# Supplementary material
Source: PubMed Central journal article supplement (PMC6521835)
Supplement: NIHMS1510068-supplement-1.pdf [file NIHMS1510068-supplement-1.pdf]

Supplementary Table 1. 162 ROIs adopted from the Desikan–Killiany parcellation atlas by FreeSurfer

| #  | ROI Name               | Abbreviations | Network | #     | ROI Name                     | Abbreviations | Network |
|----|------------------------|---------------|---------|-------|------------------------------|---------------|---------|
|    | <b>Limbic Area</b>     |               |         | 83    | ctx_S_precentral-sup-part    | L.PRS         | SMA     |
|    | left                   |               |         | 84    | ctx_S_suborbital             | L.SO          | DMN     |
| 1  | Thalamus-Proper        | L.TH          | LBN     | 85    | ctx_S_subparietal            | L.SP          | DMN     |
| 2  | Caudate                | L.CU          | LBN     | 86    | ctx_S_temporal_inf           | L.TIS         | DMN     |
| 3  | Putamen                | L.PT          | LBN     | 87    | ctx_S_temporal_sup           | L.TSS         | DMN     |
| 4  | Pallidum               | L.PA          | LBN     | 88    | ctx_S_temporal_transverse    | L.TTS         | SMA     |
| 5  | Hippocampus            | L.HP          | LBN     | right |                              |               |         |
| 6  | Amygdala               | L.AY          | LBN     | 89    | ctx_G_and_S_frontomargin     | R.FT          | FPN+DMN |
| 7  | Accumbens-area         | L.AA          | LBN     | 90    | ctx_G_and_S_occipital_inf    | R.OI          | DAN+FPN |
|    | right                  |               |         | 91    | ctx_G_and_S_paracentral      | R.PC          | SMA     |
| 8  | Thalamus-Proper        | R.TH          | LBN     | 92    | ctx_G_and_S_subcentral       | R.SC          | SMA     |
| 9  | Caudate                | R.CU          | LBN     | 93    | ctx_G_and_S_transv_frontopol | R.TF          | LBN+DMN |
| 10 | Putamen                | R.PT          | LBN     | 94    | ctx_G_and_S_cingul-Ant       | R.CA          | DMN     |
| 11 | Pallidum               | R.PA          | LBN     | 95    | ctx_G_and_S_cingul-Mid-Ant   | R.CMA         | VAN+FPN |
| 12 | Hippocampus            | R.HP          | LBN     | 96    | ctx_G_and_S_cingul-Mid-Post  | R.CMP         | SMN+DMN |
| 13 | Amygdala               | R.AY          | LBN     | 97    | ctx_G_cingul-Post-dorsal     | R.CPD         | DMN+FPN |
| 14 | Accumbens-area         | R.AA          | LBN     | 98    | ctx_G_cingul-Post-ventral    | R.CPV         | VIN+DMN |
|    | <b>Destrieux atlas</b> |               |         | 99    | ctx_G_cuneus                 | R.CN          | VIN     |
|    | left                   |               |         | 100   | ctx_G_front_inf-Opercular    | R.FIP         | VAN+SMA |

|    |                              |       |         |     |                             |       |         |
|----|------------------------------|-------|---------|-----|-----------------------------|-------|---------|
| 15 | ctx_G_and_S_frontomargin     | L.FT  | FPN+DMN | 101 | ctx_G_front_inf-Orbital     | R.FIO | DMN+FPN |
| 16 | ctx_G_and_S_occipital_inf    | L.OI  | DAN+FPN | 102 | ctx_G_front_inf-Triangul    | R.FIR | VAN+FPN |
| 17 | ctx_G_and_S_paracentral      | L.PC  | SMA     | 103 | ctx_G_front_middle          | R.FMG | DMN+FPN |
| 18 | ctx_G_and_S_subcentral       | L.SC  | SMA     | 104 | ctx_G_front_sup             | R.FSG | DMN     |
| 19 | ctx_G_and_S_transv_frontopol | L.TF  | LBN+DMN | 105 | ctx_G_Ins_lg_and_S_cent_ins | R.IN  | VAN+SMA |
| 20 | ctx_G_and_S_cingul-Ant       | L.CA  | DMN     | 106 | ctx_G_insular_short         | R.IS  | VAN+SMA |
| 21 | ctx_G_and_S_cingul-Mid-Ant   | L.CMA | VAN+FPN | 107 | ctx_G_occipital_middle      | R.OM  | VIN+DAN |
| 22 | ctx_G_and_S_cingul-Mid-Post  | L.CMP | SMN+DMN | 108 | ctx_G_occipital_sup         | R.OS  | VIN+DAN |
| 23 | ctx_G_cingul-Post-dorsal     | L.CPD | DMN+FPN | 109 | ctx_G_oc-temp_lat-fusifor   | R.TLF | VIN+LBN |
| 24 | ctx_G_cingul-Post-ventral    | L.CPV | VIN+DMN | 110 | ctx_G_oc-temp_med-Lingual   | R.TML | VIN     |
| 25 | ctx_G_cuneus                 | L.CN  | VIN     | 111 | ctx_G_oc-temp_med-Parahip   | R.TMP | VIN+LBN |
| 26 | ctx_G_front_inf-Opercular    | L.FIP | VAN+SMA | 112 | ctx_G_orbital               | R.OBG | DMN     |
| 27 | ctx_G_front_inf-Orbital      | L.FIO | DMN+FPN | 113 | ctx_G_pariet_inf-Angular    | R.PIA | DMN     |
| 28 | ctx_G_front_inf-Triangul     | L.FIR | VAN+FPN | 114 | ctx_G_pariet_inf-Supramar   | R.PIS | DMN+FPN |
| 29 | ctx_G_front_middle           | L.FMG | DMN+FPN | 115 | ctx_G_parietal_sup          | R.PS  | DAN     |
| 30 | ctx_G_front_sup              | L.FSG | DMN     | 116 | ctx_G_postcentral           | R.POS | SMN     |
| 31 | ctx_G_Ins_lg_and_S_cent_ins  | L.IN  | VAN+SMA | 117 | ctx_G_precentral            | R.PRG | SMN     |
| 32 | ctx_G_insular_short          | L.IS  | VAN+SMA | 118 | ctx_G_precuneus             | R.PU  | DMN+FPN |
| 33 | ctx_G_occipital_middle       | L.OM  | VIN+DAN | 119 | ctx_G_rectus                | R.RT  | LBN     |
| 34 | ctx_G_occipital_sup          | L.OS  | VIN+DAN | 120 | ctx_G_subcallosal           | R.SC  | LBN     |
| 35 | ctx_G_oc-temp_lat-fusifor    | L.TLF | VIN+LBN | 121 | ctx_G_temp_sup-G_T_transv   | R.TT  | SMA     |
| 36 | ctx_G_oc-temp_med-Lingual    | L.TML | VIN     | 122 | ctx_G_temp_sup-Lateral      | R.TSL | DMN     |

|    |                           |       |         |     |                               |       |         |
|----|---------------------------|-------|---------|-----|-------------------------------|-------|---------|
| 37 | ctx_G_oc-temp_med-Parahip | L.TMP | VIN+LBN | 123 | ctx_G_temp_sup-Plan_polar     | R.TSP | LBN     |
| 38 | ctx_G_orbital             | L.OBG | DMN     | 124 | ctx_G_temp_sup-Plan_tempo     | R.TST | DMN+SMA |
| 39 | ctx_G_pariet_inf-Angular  | L.PIA | DMN     | 125 | ctx_G_temporal_inf            | R.TIG | FPN+LBN |
| 40 | ctx_G_pariet_inf-Supramar | L.PIS | DMN+FPN | 126 | ctx_G_temporal_middle         | R.TMG | DMN     |
| 41 | ctx_G_parietal_sup        | L.PS  | DAN     | 127 | ctx_Lat_Fis-ant-Horizont      | R.LFH | DMN     |
| 42 | ctx_G_postcentral         | L.POS | SMN     | 128 | ctx_Lat_Fis-ant-Vertical      | R.LFV | VAN     |
| 43 | ctx_G_precentral          | L.PRG | SMN     | 129 | ctx_Lat_Fis-post              | R.LFP | SMA     |
| 44 | ctx_G_precuneus           | L.PU  | DMN+FPN | 130 | ctx_Pole_occipital            | R.PO  | VIN     |
| 45 | ctx_G_rectus              | L.RT  | LBN     | 131 | ctx_Pole_temporal             | R.PT  | LBN     |
| 46 | ctx_G_subcallosal         | L.SC  | LBN     | 132 | ctx_S_calcarine               | R.CL  | VIN     |
| 47 | ctx_G_temp_sup-G_T_transv | L.TT  | SMA     | 133 | ctx_S_central                 | R.CES | SMN     |
| 48 | ctx_G_temp_sup-Lateral    | L.TSL | DMN     | 134 | ctx_S_cingul-Marginalis       | R.CM  | SMN     |
| 49 | ctx_G_temp_sup-Plan_polar | L.TSP | LBN     | 135 | ctx_S_circular_insula_ant     | R.CIA | DMN+FPN |
| 50 | ctx_G_temp_sup-Plan_tempo | L.TST | DMN+SMA | 136 | ctx_S_circular_insula_inf     | R.CII | VAN     |
| 51 | ctx_G_temporal_inf        | L.TIG | FPN+LBN | 137 | ctx_S_circular_insula_sup     | R.CIS | VAN+SMA |
| 52 | ctx_G_temporal_middle     | L.TMG | DMN     | 138 | ctx_S_collat_transv_ant       | R.CTA | LBN     |
| 53 | ctx_Lat_Fis-ant-Horizont  | L.LFH | DMN     | 139 | ctx_S_collat_transv_post      | R.CTP | VIN     |
| 54 | ctx_Lat_Fis-ant-Vertical  | L.LFV | VAN     | 140 | ctx_S_front_inf               | R.FIS | FPN     |
| 55 | ctx_Lat_Fis-post          | L.LFP | SMA     | 141 | ctx_S_front_middle            | R.FMS | FPN     |
| 56 | ctx_Pole_occipital        | L.PO  | VIN     | 142 | ctx_S_front_sup               | R.FSS | DMN     |
| 57 | ctx_Pole_temporal         | L.PT  | LBN     | 143 | ctx_S_interm_prim-Jensen      | R.IPJ | DMN+FPN |
| 58 | ctx_S_calcarine           | L.CL  | VIN     | 144 | ctx_S_intrapariet_and_P_trans | R.IP  | DAN     |

|    |                               |       |         |     |                               |       |         |
|----|-------------------------------|-------|---------|-----|-------------------------------|-------|---------|
| 59 | ctx_S_central                 | L.CES | SMN     | 145 | ctx_S_oc_middle_and_Lunatus   | R.OML | DAN     |
| 60 | ctx_S_cingul-Marginalis       | L.CM  | SMN     | 146 | ctx_S_oc_sup_and_transversal  | R.OST | VIN     |
| 61 | ctx_S_circular_insula_ant     | L.CIA | DMN+FPN | 147 | ctx_S_occipital_ant           | R.OA  | VIN     |
| 62 | ctx_S_circular_insula_inf     | L.CII | VAN     | 148 | ctx_S_oc-temp_lat             | R.TL  | VIN     |
| 63 | ctx_S_circular_insula_sup     | L.CIS | VAN+SMA | 149 | ctx_S_oc-temp_med_and_Lingual | R.TML | VIN+LBN |
| 64 | ctx_S_collat_transv_ant       | L.CTA | LBN     | 150 | ctx_S_orbital_lateral         | R.OL  | LBN     |
| 65 | ctx_S_collat_transv_post      | L.CTP | VIN     | 151 | ctx_S_orbital_med-olfact      | R.OMO | LBN     |
| 66 | ctx_S_front_inf               | L.FIS | FPN     | 152 | ctx_S_orbital-H_Shaped        | R.OHS | LBN     |
| 67 | ctx_S_front_middle            | L.FMS | FPN     | 153 | ctx_S_parieto_occipital       | R.PO  | VIN     |
| 68 | ctx_S_front_sup               | L.FSS | DMN     | 154 | ctx_S_pericallosal            | R.PE  | DMN+FPN |
| 69 | ctx_S_interm_prim-Jensen      | L.IPJ | DMN+FPN | 155 | ctx_S_postcentral             | R.POS | SMN     |
| 70 | ctx_S_intrapariet_and_P_trans | L.IP  | DAN     | 156 | ctx_S_precentral-inf-part     | R.PRI | SMN     |
| 71 | ctx_S_oc_middle_and_Lunatus   | L.OML | DAN     | 157 | ctx_S_precentral-sup-part     | R.PRS | SMA     |
| 72 | ctx_S_oc_sup_and_transversal  | L.OST | VIN     | 158 | ctx_S_suborbital              | R.SO  | DMN     |
| 73 | ctx_S_occipital_ant           | L.OA  | VIN     | 159 | ctx_S_subparietal             | R.SP  | DMN     |
| 74 | ctx_S_oc-temp_lat             | L.TL  | VIN     | 160 | ctx_S_temporal_inf            | R.TIS | DMN     |
| 75 | ctx_S_oc-temp_med_and_Lingual | L.TML | VIN+LBN | 161 | ctx_S_temporal_sup            | R.TSS | DMN     |
| 76 | ctx_S_orbital_lateral         | L.OL  | LBN     | 162 | ctx_S_temporal_transverse     | R.TTS | SMA     |
| 77 | ctx_S_orbital_med-olfact      | L.OMO | LBN     |     |                               |       |         |
| 78 | ctx_S_orbital-H_Shaped        | L.OHS | LBN     |     |                               |       |         |
| 79 | ctx_S_parieto_occipital       | L.PO  | VIN     |     |                               |       |         |

|    |                           |       |         |
|----|---------------------------|-------|---------|
| 80 | ctx_S_pericallosal        | L.PE  | DMN+FPN |
| 81 | ctx_S_postcentral         | L.POS | SMN     |
| 82 | ctx_S_precentral-inf-part | L.PRI | SMN     |

Abbreviations: ctx: cortex; DAN: dorsal attention network; DMN: default mode network; FPN: fronto-parietal network; G: gyrus; LIB: limbic network; SMA: somamotor network; S: sulcus; VAL: ventral attention network; VIN: visual network;

Supplementary Table 2. Association between functional connectivity and core symptom severity

| SRS total scores                              |         |       |        |       |                |         |       |       |        |                 |
|-----------------------------------------------|---------|-------|--------|-------|----------------|---------|-------|-------|--------|-----------------|
| ASD                                           |         |       |        |       |                | TD      |       |       |        |                 |
| Functional connectivity                       | p value | r     | F      | SE    | 95% CI         | p value | r     | F     | SE     | 95% CI          |
| Insula -<br>post transverse collateral sulcus | 0.0004  | 0.376 | 12.020 | 23.70 | 16.89 to 62.68 | 0.487   | 0.016 | 0.490 | 12.600 | -14.36 to 6.881 |
| Orbital gyrus -<br>Anterior horizont cortex   | 0.0076  | 0.309 | 7.754  | 24.62 | 10.14 to 61.17 | 0.249   | 0.021 | 1.350 | 12.500 | -3.641 to 13.94 |

Abbreviations: ASD: autism spectrum disorder; TD: typically developed

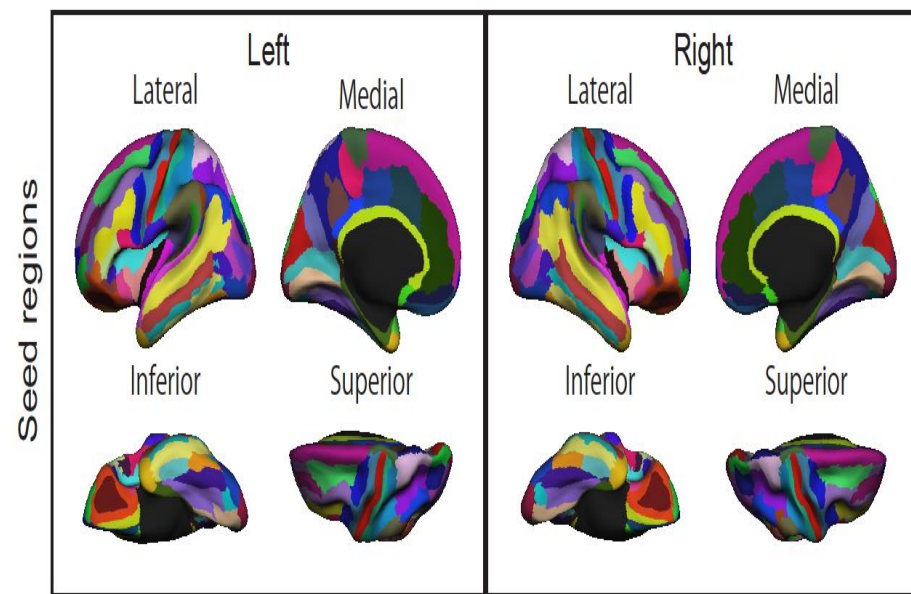

**Supplementary Figure 1** Seed regions for gray matter surface parcellation were based on the Desikan–Killiany parcellation atlas. Color in brain map was calculated using parcellation by Freesurfer.

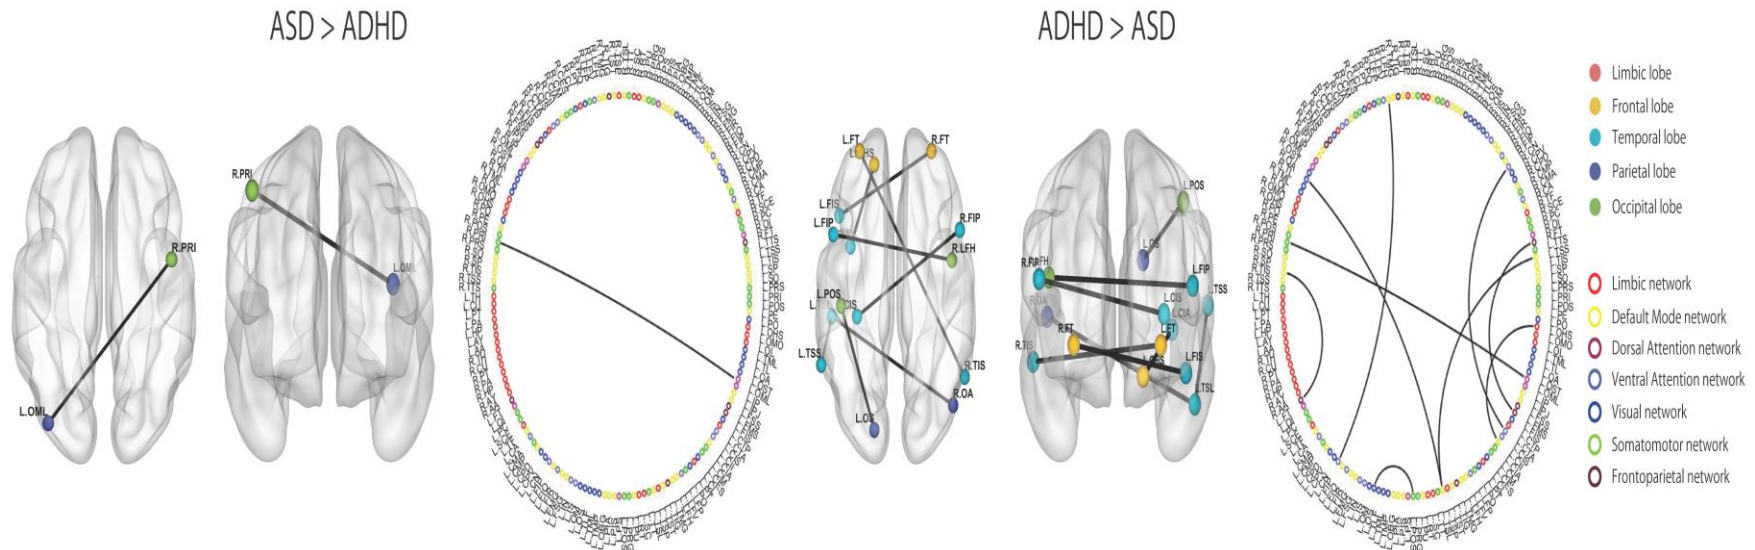

**Supplementary Figure 2** ROI-to-ROI functional connectivity analysis between ASD and ADHD. The ADHD group showed predominantly higher connectivity than the ASD group. Colored circles indicate brain regions. Colored lines indicate networks.

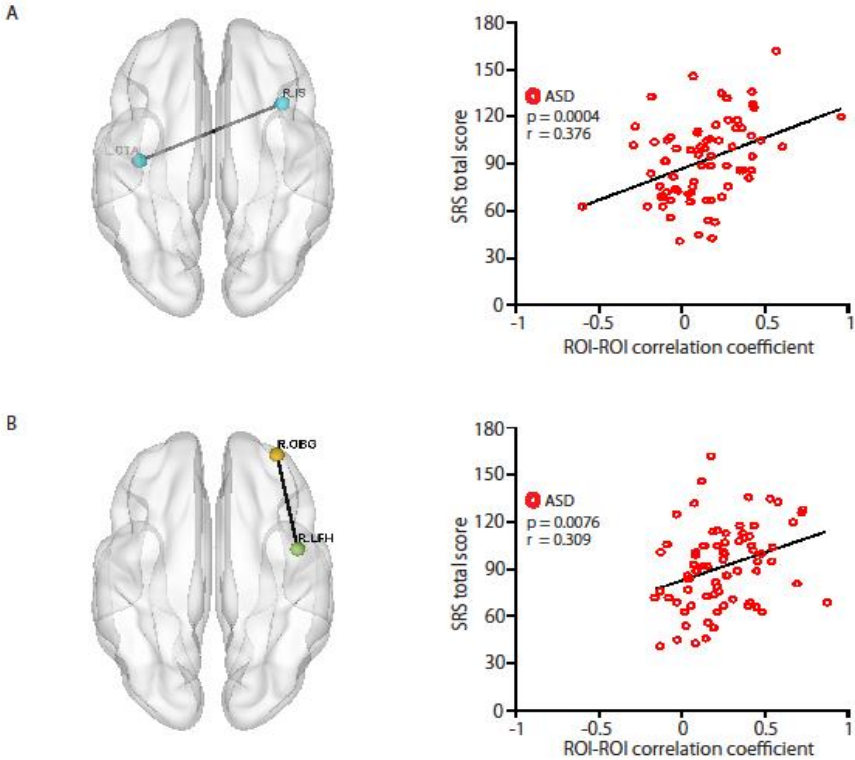

**Supplementary Figure 3** Relationship between functional connectivity and core symptom severity. A: black line indicates functional connectivity between right insula sulcus and post transverse collateral sulcus. Scatter plots showing the correlations of the strength of functional connectivity with SRS total scores (left). B: black line indicates functional connectivity between right orbital gyrus and right anterior horizontal cortex. Scatter plots showing the correlations of the strength of functional connectivity with SRS total scores (left).
